# Supplementary material
Source: publisher site journal article supplement (https://www.dovepress.com/get_supplementary_file.php?f=195235.xlsx)
Supplement: Supplementary file 1 [file get_supplementary_file.php]

## Sheet: LS vs N
tracking_id	gene_name	gene_id	ref_transcript_id	gene_type	class_code	chrome	start	end	strand	sample_1	sample_2	value_1	value_2	log2.fold_change.	p_value	q_value	Regulation
ENST00000379963.1	RP11-401P9.6	ENSG00000205414.1	ENST00000379963.1	antisense	=	chr16	50606076	50613684	-	N	LS	0.0822617	2.63923	5.00375	5e-05	0.00826967	UP
ENST00000414790.6	H19	ENSG00000130600.18	ENST00000414790.6	processed_transcript	=	chr11	1995176	1997875	-	N	LS	0.941847	40.8971	5.44036	5e-05	0.00826967	UP
ENST00000419422.1	RP11-132A1.4	ENSG00000232445.1	ENST00000419422.1	antisense	=	chr7	101308346	101310985	+	N	LS	0.69798	5.4219	2.95754	5e-05	0.00826967	UP
ENST00000433310.6	AF131217.1	ENSG00000232855.6	ENST00000433310.6	lincRNA	=	chr21	28439346	28674848	-	N	LS	0.642756	0.0871036	-2.88347	0.00015	0.0208353	DOWN
ENST00000438158.1	RP11-400N13.3	ENSG00000232679.1	ENST00000438158.1	lincRNA	=	chr1	222041705	222064763	-	N	LS	0	2.81716	Inf	5e-05	0.00826967	UP
ENST00000441095.2	AL133493.2	ENSG00000233922.2	ENST00000441095.2	lincRNA	=	chr21	45593654	45603056	+	N	LS	0.0464423	0.56139	3.59549	5e-05	0.00826967	UP
ENST00000500989.2	RP11-622O11.2	ENSG00000245164.6	ENST00000500989.2	lincRNA	=	chr8	125941129	125951189	-	N	LS	1.19453	0.373736	-1.67635	0.00035	0.0407384	DOWN
ENST00000518049.1	C8orf51	ENSG00000254389.3	ENST00000518049.1	antisense	=	chr8	143366631	143368548	-	N	LS	0.173152	1.04632	2.59522	0.00015	0.0208353	UP
ENST00000566733.2	RP1-140K8.5	ENSG00000260604.2	ENST00000566733.2	lincRNA	=	chr6	3904920	3911979	-	N	LS	0.0161792	0.39601	4.61332	5e-05	0.00826967	UP
ENST00000582106.1	MAFG-AS1	ENSG00000265688.1	ENST00000582106.1	antisense	=	chr17	81927829	81930753	+	N	LS	0.261081	1.4605	2.48389	0.00035	0.0407384	UP
ENST00000606056.1	CTD-2325A15.5	ENSG00000272234.1	ENST00000606056.1	antisense	=	chr5	42806394	42806997	+	N	LS	5.83739	0.683762	-3.09376	0.00045	0.0495046	DOWN
ENST00000607746.1	RP11-861A13.4	ENSG00000271856.1	ENST00000607746.1	lincRNA	=	chr3	108125821	108138610	+	N	LS	0.594998	0.113609	-2.38881	0.0004	0.0453517	DOWN
ENST00000613291.1	RP11-1143G9.5	ENSG00000274979.1	ENST00000613291.1	lincRNA	=	chr12	69326574	69331882	-	N	LS	0.186245	1.59867	3.1016	5e-05	0.00826967	UP
ENST00000618589.1	CH17-373J23.1	ENSG00000276216.1	ENST00000618589.1	lincRNA	=	chr1	145281116	145281462	+	N	LS	99.1787	32.2975	-1.61861	0.0004	0.0453517	DOWN
ENST00000618966.1	RP11-54H7.4	ENSG00000275216.1	ENST00000618966.1	lincRNA	=	chr13	109269634	109273838	+	N	LS	0.112069	2.87869	4.68295	5e-05	0.00826967	UP
ENST00000623140.1	RP11-401P9.7	ENSG00000278909.1	ENST00000623140.1	TEC	=	chr16	50555355	50558719	+	N	LS	0.178517	5.27886	4.88609	5e-05	0.00826967	UP
ENST00000623300.1	RP1-47M23.3	ENSG00000280135.1	ENST00000623300.1	TEC	=	chr6	107697299	107700218	-	N	LS	0.872643	0.149544	-2.54483	0.00035	0.0407384	DOWN
ENST00000630242.2	KIAA0125	ENSG00000226777.7	ENST00000630242.2	lincRNA	=	chr14	105917979	105932642	+	N	LS	1.65245	0.26082	-2.66349	5e-05	0.00826967	DOWN
ENST00000631338.1	RP11-640L9.2	ENSG00000281100.1	ENST00000631338.1	TEC	=	chr3	36823151	36825158	-	N	LS	1.29492	0.296151	-2.12846	0.0002	0.0262286	DOWN
MSTRG.14402.1	-	-	-	novel_lncRNA	u	chr17	23016249	23016485	-	N	LS	0	9.81267	Inf	0.0003	0.0366004	UP
MSTRG.14405.1	-	-	-	novel_lncRNA	u	chr17	25569124	25569362	-	N	LS	0	4.11205	Inf	0.0004	0.0453517	UP
MSTRG.14406.1	-	-	-	novel_lncRNA	u	chr17	26228973	26229208	-	N	LS	0	13.8051	Inf	0.00015	0.0208353	UP
MSTRG.14408.1	-	-	-	novel_lncRNA	u	chr17	26619440	26619882	-	N	LS	0	2.32338	Inf	0.00015	0.0208353	UP
MSTRG.14409.1	-	-	-	novel_lncRNA	u	chr17	26885699	26885978	+	N	LS	0	9.3679	Inf	0.00015	0.0208353	UP
MSTRG.1487.1	-	-	-	novel_lncRNA	u	chr1	64352473	64352992	-	N	LS	0	1.41428	Inf	0.00015	0.0208353	UP
MSTRG.1512.1	-	-	-	novel_lncRNA	u	chr1	65644591	65645021	-	N	LS	0	2.46405	Inf	0.0002	0.0262286	UP
MSTRG.1647.1	SAMD13	-	ENST00000370673.7	novel_lncRNA	x	chr1	84278753	84299476	-	N	LS	1.66682	0.438242	-1.9273	5e-05	0.00826967	DOWN
MSTRG.16635.1	-	-	-	novel_lncRNA	u	chr19	1541498	1543173	-	N	LS	0.0705106	0.861064	3.61021	5e-05	0.00826967	UP
MSTRG.18833.5	AC016735.2	-	ENST00000422351.5	lincRNA	j	chr2	43016157	43039541	-	N	LS	0.0356429	0.505851	3.82703	0.00015	0.0208353	UP
MSTRG.18834.1	-	-	-	novel_lncRNA	u	chr2	43194128	43195512	+	N	LS	0.358826	2.16095	2.59031	5e-05	0.00826967	UP
MSTRG.19039.1	-	-	-	novel_lncRNA	u	chr2	64277962	64280644	+	N	LS	0.0513808	0.585067	3.5093	5e-05	0.00826967	UP
MSTRG.19040.1	-	-	-	novel_lncRNA	u	chr2	64282313	64293138	+	N	LS	0.0712666	0.407657	2.51606	0.0002	0.0262286	UP
MSTRG.19239.1	-	-	-	novel_lncRNA	u	chr2	78192639	78316322	-	N	LS	0.0311317	0.515634	4.04989	5e-05	0.00826967	UP
MSTRG.19468.1	AFF3	-	ENST00000409579.5	novel_lncRNA	i	chr2	99967294	99996055	-	N	LS	0.999743	0.083178	-3.58728	0.00015	0.0208353	DOWN
MSTRG.225.1	-	-	-	novel_lncRNA	u	KQ458386.1	206854	212684	-	N	LS	0.428321	0.0367365	-3.54341	5e-05	0.00826967	DOWN
MSTRG.23301.4	AC123023.1	-	ENST00000455974.1	lincRNA	j	chr3	34183329	34268811	+	N	LS	0.024208	1.88281	6.28126	0.0001	0.0149936	UP
MSTRG.23301.5	AC018359.1	-	ENST00000424786.5	lincRNA	j	chr3	34183329	34413475	+	N	LS	0.0284986	0.584418	4.35804	0.00025	0.0318317	UP
MSTRG.24855.1	-	-	-	novel_lncRNA	u	chr3	187819322	187890236	-	N	LS	0.130505	0.821314	2.65383	0.00035	0.0407384	UP
MSTRG.25168.1	-	-	-	novel_lncRNA	u	chr4	10916416	10953310	+	N	LS	0.0273017	0.75658	4.79243	0.0001	0.0149936	UP
MSTRG.25557.1	-	-	-	novel_lncRNA	u	chr4	75176573	75181190	-	N	LS	2.27066	0.394244	-2.52595	5e-05	0.00826967	DOWN
MSTRG.25642.1	-	-	-	novel_lncRNA	u	chr4	83085054	83087522	-	N	LS	29.3981	2.46551	-3.57576	5e-05	0.00826967	DOWN
MSTRG.25681.1	-	-	-	novel_lncRNA	u	chr4	87924447	87924685	+	N	LS	0	6.34458	Inf	0.00045	0.0495046	UP
MSTRG.2663.1	-	-	-	novel_lncRNA	u	chr1	167045698	167048219	-	N	LS	2.8869	0.215208	-3.74572	5e-05	0.00826967	DOWN
MSTRG.27178.1	RP11-138J23.1	-	ENST00000514769.1	lincRNA	j	chr5	104079911	104202616	+	N	LS	0.00338357	0.774371	7.83834	5e-05	0.00826967	UP
MSTRG.27468.1	CTB-28J9.3	-	ENST00000514459.1	antisense	e	chr5	136214048	136226167	+	N	LS	1.83775	0.19068	-3.26871	5e-05	0.00826967	DOWN
MSTRG.2875.1	-	-	-	novel_lncRNA	u	chr1	183613395	183613787	+	N	LS	0	1.9739	Inf	0.0002	0.0262286	UP
MSTRG.29201.1	-	-	-	novel_lncRNA	u	chr6	110415650	110423345	+	N	LS	0.944058	0.150579	-2.64835	5e-05	0.00826967	DOWN
MSTRG.29388.1	-	-	-	novel_lncRNA	u	chr6	133901886	133907959	+	N	LS	0.892414	0.103405	-3.10941	5e-05	0.00826967	DOWN
MSTRG.31166.1	-	-	-	novel_lncRNA	u	chr7	139036089	139036952	+	N	LS	0.407565	2.41152	2.56484	0.0001	0.0149936	UP
MSTRG.3399.1	-	-	-	novel_lncRNA	u	chr1	230601396	230609166	+	N	LS	6.58285	0.793323	-3.05273	5e-05	0.00826967	DOWN
MSTRG.34354.2	RP11-431J24.2	-	ENST00000435789.1	antisense	j	chrX	16152745	16184122	-	N	LS	0.099659	3.05333	4.93724	5e-05	0.00826967	UP
MSTRG.34363.1	-	-	-	novel_lncRNA	u	chrX	16771222	16771835	-	N	LS	1.01539	5.08541	2.32433	0.00025	0.0318317	UP
MSTRG.34989.1	-	-	-	novel_lncRNA	u	chrX	111546315	111546625	+	N	LS	0	1.07705	Inf	0.00035	0.0407384	UP
MSTRG.35002.1	RP1-290B4.1	-	ENST00000604344.1	novel_lncRNA	x	chrX	113883525	113931180	-	N	LS	1.27746	0.113215	-3.49614	5e-05	0.00826967	DOWN
MSTRG.35018.2	RP11-761E20.1	-	ENST00000430756.2	lincRNA	e	chrX	115884087	115969164	-	N	LS	2.48908	0.925381	-1.42749	5e-05	0.00826967	DOWN
MSTRG.35326.2	AC006032.1	-	ENST00000425031.1	lincRNA	o	chrY	3002998	3137004	+	N	LS	2.17189	0.533601	-2.02512	5e-05	0.00826967	DOWN
MSTRG.5015.1	-	-	-	novel_lncRNA	u	chr11	2242299	2251617	-	N	LS	0.0804484	0.985079	3.6141	5e-05	0.00826967	UP
MSTRG.5016.1	-	-	-	novel_lncRNA	u	chr11	2251899	2254561	-	N	LS	0.112631	1.27344	3.49906	5e-05	0.00826967	UP
MSTRG.5827.1	-	-	-	novel_lncRNA	u	chr11	65687267	65694167	-	N	LS	0.0406523	1.35726	5.06122	5e-05	0.00826967	UP
MSTRG.7428.4	RP11-96H19.1	-	ENST00000551503.5	lincRNA	j	chr12	46387747	46652550	+	N	LS	1.41516	0.575582	-1.29787	0.0004	0.0453517	DOWN
MSTRG.8018.1	RP11-359M6.1	-	ENST00000548359.1	novel_lncRNA	x	chr12	79541044	79573236	-	N	LS	1.44205	0.665043	-1.1166	0.0001	0.0149936	DOWN
MSTRG.8400.1	RP11-497G19.1	-	ENST00000546835.1	novel_lncRNA	x	chr12	116652369	116661727	-	N	LS	0.0770007	0.546907	2.82835	5e-05	0.00826967	UP
MSTRG.9252.1	-	-	-	novel_lncRNA	u	chr13	106042652	106059855	-	N	LS	0.0543489	0.327258	2.5901	0.0001	0.0149936	UP
MSTRG.9732.1	-	-	-	novel_lncRNA	u	chr14	46702299	46726618	-	N	LS	2.80226	0.402989	-2.79778	5e-05	0.00826967	DOWN
MSTRG.988.1	-	-	-	novel_lncRNA	u	chr1	34371730	34413687	-	N	LS	0.0517867	0.518327	3.32321	5e-05	0.00826967	UP

## Sheet: ES vs N
tracking_id	gene_name	gene_id	ref_transcript_id	gene_type	class_code	chrome	start	end	strand	sample_1	sample_2	value_1	value_2	log2.fold_change.	p_value	q_value	Regulation
ENST00000366424.2	AC144450.2	ENSG00000203635.2	ENST00000366424.2	lincRNA	=	chr2	1620510	1625419	-	N	ES	0.0844151	0.534598	2.66288	0.00035	0.0405821	UP
ENST00000414790.6	H19	ENSG00000130600.18	ENST00000414790.6	processed_transcript	=	chr11	1995176	1997875	-	N	ES	0.944201	39.1887	5.3752	5e-05	0.00807114	UP
ENST00000419422.1	RP11-132A1.4	ENSG00000232445.1	ENST00000419422.1	antisense	=	chr7	101308346	101310985	+	N	ES	0.700072	5.74296	3.03622	5e-05	0.00807114	UP
ENST00000420877.1	AP000330.8	ENSG00000234380.1	ENST00000420877.1	antisense	=	chr21	34745757	34784886	+	N	ES	0.0537683	0.396681	2.88315	0.0002	0.0259776	UP
ENST00000434296.2	RP1-249H1.4	ENSG00000227502.2	ENST00000434296.2	lincRNA	=	chr6	113868013	113873351	-	N	ES	1.60872	0.521482	-1.62522	0.0001	0.014718	DOWN
ENST00000436524.1	RP11-388N2.1	ENSG00000233516.1	ENST00000436524.1	lincRNA	=	chr9	117462294	117466260	-	N	ES	0.475546	0	-Inf	5e-05	0.00807114	DOWN
ENST00000438158.1	RP11-400N13.3	ENSG00000232679.1	ENST00000438158.1	lincRNA	=	chr1	222041705	222064763	-	N	ES	0	2.68542	Inf	5e-05	0.00807114	UP
ENST00000513358.3	RP11-253E3.3	ENSG00000250899.3	ENST00000513358.3	lincRNA	=	chr12	3041437	3044950	+	N	ES	0.498572	1.52608	1.61396	0.00025	0.0309499	UP
ENST00000539278.1	CTD-3193O13.12	ENSG00000214248.2	ENST00000539278.1	antisense	=	chr19	7898804	7903542	-	N	ES	0.576709	1.7382	1.59168	0.0002	0.0259776	UP
ENST00000569449.1	RP11-588K22.2	ENSG00000260244.1	ENST00000569449.1	sense_overlapping	=	chr4	155734448	155737062	+	N	ES	1.8916	6.30076	1.73592	0.00035	0.0405821	UP
ENST00000582106.1	MAFG-AS1	ENSG00000265688.1	ENST00000582106.1	antisense	=	chr17	81927829	81930753	+	N	ES	0.261853	1.74045	2.73263	0.00015	0.0207292	UP
ENST00000605886.1	RP11-284F21.10	ENSG00000272405.1	ENST00000605886.1	antisense	=	chr1	156641666	156644887	-	N	ES	3.07816	7.6752	1.31814	0.00045	0.0484542	UP
ENST00000618966.1	RP11-54H7.4	ENSG00000275216.1	ENST00000618966.1	lincRNA	=	chr13	109269634	109273838	+	N	ES	0.112355	4.01836	5.16047	5e-05	0.00807114	UP
ENST00000623381.1	RP11-58O9.2	ENSG00000279806.1	ENST00000623381.1	TEC	=	chr17	40473554	40475289	-	N	ES	0.339841	2.58889	2.9294	0.00015	0.0207292	UP
ENST00000624705.1	CTD-3014M21.1	ENSG00000279602.1	ENST00000624705.1	TEC	=	chr17	43360041	43361361	-	N	ES	10.5964	3.36274	-1.65586	0.00035	0.0405821	DOWN
ENST00000624982.1	RP11-832A4.7	ENSG00000280032.1	ENST00000624982.1	TEC	=	chr11	118264593	118266817	+	N	ES	1.20697	0.147385	-3.03373	5e-05	0.00807114	DOWN
ENST00000626538.1	BLACAT1	ENSG00000281406.1	ENST00000626538.1	lincRNA	=	chr1	205434886	205437879	-	N	ES	0.105912	1.65358	3.96465	5e-05	0.00807114	UP
ENST00000630242.2	KIAA0125	ENSG00000226777.7	ENST00000630242.2	lincRNA	=	chr14	105917979	105932642	+	N	ES	1.65789	0.360287	-2.20213	5e-05	0.00807114	DOWN
MSTRG.12001.1	RP11-692C24.1	-	ENST00000553410.1	lincRNA	e	chr15	91506634	91548885	+	N	ES	0.0118899	0.637147	5.74381	0.0004	0.0449011	UP
MSTRG.13715.1	-	-	-	novel_lncRNA	u	chr16	88185174	88186745	-	N	ES	0.0485335	1.47475	4.92535	5e-05	0.00807114	UP
MSTRG.1448.1	RP11-776H12.1	-	ENST00000439156.2	novel_lncRNA	i	chr1	60626128	60639026	-	N	ES	0.206322	1.0906	2.40215	5e-05	0.00807114	UP
MSTRG.15491.1	-	-	-	novel_lncRNA	u	chr17	65494086	65514352	-	N	ES	0	1.19103	Inf	5e-05	0.00807114	UP
MSTRG.1639.1	-	-	-	novel_lncRNA	u	chr1	83356395	83368080	-	N	ES	0.314693	0.0267275	-3.55755	5e-05	0.00807114	DOWN
MSTRG.16404.1	-	-	-	novel_lncRNA	u	chr18	57803444	57809934	+	N	ES	1.13435	0.346659	-1.71027	0.0002	0.0259776	DOWN
MSTRG.1647.1	SAMD13	-	ENST00000370673.7	novel_lncRNA	x	chr1	84278753	84299476	-	N	ES	1.67203	0.616521	-1.43938	0.00045	0.0484542	DOWN
MSTRG.16635.1	-	-	-	novel_lncRNA	u	chr19	1541498	1543173	-	N	ES	0.0707449	1.59888	4.49829	5e-05	0.00807114	UP
MSTRG.17733.1	-	-	-	novel_lncRNA	u	chr19	41151914	41169636	-	N	ES	0.674891	1.45417	1.10747	0.00045	0.0484542	UP
MSTRG.17735.1	-	-	-	novel_lncRNA	u	chr19	41174718	41176221	-	N	ES	0.334829	1.67882	2.32595	0.0002	0.0259776	UP
MSTRG.18071.1	-	-	-	novel_lncRNA	u	chr19	50099607	50099978	+	N	ES	0	0.856064	Inf	0.00045	0.0484542	UP
MSTRG.18761.1	VIT	-	ENST00000379242.7	novel_lncRNA	x	chr2	36798613	36807676	-	N	ES	2.77512	0.815082	-1.76753	5e-05	0.00807114	DOWN
MSTRG.19239.1	-	-	-	novel_lncRNA	u	chr2	78192639	78316322	-	N	ES	0.0311852	0.648037	4.37714	5e-05	0.00807114	UP
MSTRG.19345.2	AC096579.15	-	ENST00000624935.3	processed_transcript	o	chr2	88857161	88861923	-	N	ES	5874.96	2214.83	-1.40738	0.00015	0.0207292	DOWN
MSTRG.19468.1	AFF3	-	ENST00000409579.5	novel_lncRNA	i	chr2	99967294	99996055	-	N	ES	1.00223	0.168515	-2.57227	5e-05	0.00807114	DOWN
MSTRG.20117.1	-	-	-	novel_lncRNA	u	chr2	175594188	175653694	+	N	ES	0.228386	0.565185	1.30725	0.00025	0.0309499	UP
MSTRG.2016.1	-	-	-	novel_lncRNA	u	chr1	117651836	117654645	-	N	ES	1.48338	0.144336	-3.36139	5e-05	0.00807114	DOWN
MSTRG.20302.1	-	-	-	novel_lncRNA	u	chr2	196822573	196822780	+	N	ES	0	59.1742	Inf	0.00045	0.0484542	UP
MSTRG.21827.4	AP000472.2	-	ENST00000420255.1	lincRNA	j	chr21	22028955	22062813	-	N	ES	1.68073	0.0302477	-5.79612	5e-05	0.00807114	DOWN
MSTRG.22009.1	AF064858.11	-	ENST00000419664.1	novel_lncRNA	x	chr21	39010012	39031163	+	N	ES	0.0150287	0.438818	4.86783	5e-05	0.00807114	UP
MSTRG.22064.1	-	-	-	novel_lncRNA	u	chr21	42799932	42810723	+	N	ES	0.0515836	0.585139	3.50379	5e-05	0.00807114	UP
MSTRG.22065.1	-	-	-	novel_lncRNA	u	chr21	42811112	42827203	+	N	ES	0.0463502	0.450059	3.27947	5e-05	0.00807114	UP
MSTRG.225.1	-	-	-	novel_lncRNA	u	KQ458386.1	206854	212684	-	N	ES	0.429774	0.0925648	-2.21504	0.0003	0.0358334	DOWN
MSTRG.23301.4	AC123023.1	-	ENST00000455974.1	lincRNA	j	chr3	34183329	34268811	+	N	ES	0.024269	2.59478	6.74035	0.00015	0.0207292	UP
MSTRG.23301.5	AC018359.1	-	ENST00000424786.5	lincRNA	j	chr3	34183329	34413475	+	N	ES	0.0285765	0.868094	4.92495	0.00015	0.0207292	UP
MSTRG.23302.1	AC018359.1	-	ENST00000424786.5	lincRNA	e	chr3	34498332	34613905	+	N	ES	0.0215869	0.745921	5.11079	5e-05	0.00807114	UP
MSTRG.24855.1	-	-	-	novel_lncRNA	u	chr3	187819322	187890236	-	N	ES	0.130777	1.02992	2.97735	5e-05	0.00807114	UP
MSTRG.25168.1	-	-	-	novel_lncRNA	u	chr4	10916416	10953310	+	N	ES	0.0274156	0.820737	4.90385	5e-05	0.00807114	UP
MSTRG.25358.1	GABRB1	-	ENST00000295454.7	novel_lncRNA	x	chr4	47088184	47187753	-	N	ES	0.159742	1.12672	2.81831	5e-05	0.00807114	UP
MSTRG.25469.1	-	-	-	novel_lncRNA	u	chr4	61200525	61201142	+	N	ES	4.74188	0.605837	-2.96846	5e-05	0.00807114	DOWN
MSTRG.25557.1	-	-	-	novel_lncRNA	u	chr4	75176573	75181190	-	N	ES	2.27678	0.30382	-2.90571	5e-05	0.00807114	DOWN
MSTRG.25642.1	-	-	-	novel_lncRNA	u	chr4	83085054	83087522	-	N	ES	29.4788	3.7082	-2.99089	5e-05	0.00807114	DOWN
MSTRG.26207.1	RP11-364P22.3	-	ENST00000625016.1	TEC	o	chr4	157784085	157824264	-	N	ES	0.0172711	0.340141	4.2997	5e-05	0.00807114	UP
MSTRG.26432.1	-	-	-	novel_lncRNA	u	chr5	2266876	2278481	+	N	ES	0	0.525396	Inf	0.00015	0.0207292	UP
MSTRG.26910.2	RP11-60A8.1	-	ENST00000513379.1	lincRNA	o	chr5	73213954	73247469	+	N	ES	0.0372502	1.03555	4.797	5e-05	0.00807114	UP
MSTRG.2705.1	RP11-375F2.3	-	ENST00000440227.1	novel_lncRNA	x	chr1	168927276	169008916	-	N	ES	0.239158	1.21521	2.34517	5e-05	0.00807114	UP
MSTRG.27178.1	RP11-138J23.1	-	ENST00000514769.1	lincRNA	j	chr5	104079911	104202616	+	N	ES	0.00339122	1.15618	8.41334	5e-05	0.00807114	UP
MSTRG.27468.1	CTB-28J9.3	-	ENST00000514459.1	antisense	e	chr5	136214048	136226167	+	N	ES	1.84319	0.411371	-2.16369	5e-05	0.00807114	DOWN
MSTRG.27496.1	-	-	-	novel_lncRNA	u	chr5	139509691	139514757	+	N	ES	0.022867	1.09279	5.57861	5e-05	0.00807114	UP
MSTRG.29201.1	-	-	-	novel_lncRNA	u	chr6	110415650	110423345	+	N	ES	0.946578	0.155667	-2.60426	5e-05	0.00807114	DOWN
MSTRG.29388.1	-	-	-	novel_lncRNA	u	chr6	133901886	133907959	+	N	ES	0.894841	0.150563	-2.57126	0.00015	0.0207292	DOWN
MSTRG.30014.1	-	-	-	novel_lncRNA	u	chr7	29750442	29750947	-	N	ES	0	0.743638	Inf	0.00015	0.0207292	UP
MSTRG.31881.2	RP11-150O12.3	-	ENST00000522471.1	lincRNA	o	chr8	37565234	37599858	-	N	ES	1.03175	3.03071	1.55457	5e-05	0.00807114	UP
MSTRG.32624.11	PVT1	-	ENST00000513868.6	lincRNA	j	chr8	127795820	128022861	+	N	ES	1.1337	3.71619	1.71279	5e-05	0.00807114	UP
MSTRG.32624.21	PVT1	-	ENST00000513868.6	lincRNA	j	chr8	127890677	128096654	+	N	ES	0.784559	2.68473	1.77482	0.0004	0.0449011	UP
MSTRG.34354.2	RP11-431J24.2	-	ENST00000435789.1	antisense	j	chrX	16152745	16184122	-	N	ES	0.0999505	2.93178	4.87442	5e-05	0.00807114	UP
MSTRG.35002.1	RP1-290B4.1	-	ENST00000604344.1	novel_lncRNA	x	chrX	113883525	113931180	-	N	ES	1.28135	0.356765	-1.84462	5e-05	0.00807114	DOWN
MSTRG.35018.2	RP11-761E20.1	-	ENST00000430756.2	lincRNA	e	chrX	115884087	115969164	-	N	ES	2.49656	1.09487	-1.18918	5e-05	0.00807114	DOWN
MSTRG.3787.1	-	-	-	novel_lncRNA	u	chr10	20456905	20476946	+	N	ES	0.0287538	0.377892	3.71615	5e-05	0.00807114	UP
MSTRG.3788.1	-	-	-	novel_lncRNA	u	chr10	20539642	20546116	+	N	ES	0.0274911	0.350464	3.67223	5e-05	0.00807114	UP
MSTRG.5015.1	-	-	-	novel_lncRNA	u	chr11	2242299	2251617	-	N	ES	0.0806967	0.821651	3.34794	5e-05	0.00807114	UP
MSTRG.5016.1	-	-	-	novel_lncRNA	u	chr11	2251899	2254561	-	N	ES	0.113013	1.11531	3.30289	5e-05	0.00807114	UP
MSTRG.5827.1	-	-	-	novel_lncRNA	u	chr11	65687267	65694167	-	N	ES	0.040773	0.706781	4.11558	5e-05	0.00807114	UP
MSTRG.8400.1	RP11-497G19.1	-	ENST00000546835.1	novel_lncRNA	x	chr12	116652369	116661727	-	N	ES	0.0772095	0.631868	3.03277	0.00015	0.0207292	UP
MSTRG.8918.1	RP11-269C23.3	-	ENST00000432701.2	lincRNA	j	chr13	44400250	44405984	-	N	ES	0.597301	2.45889	2.04148	5e-05	0.00807114	UP
MSTRG.9268.1	-	-	-	novel_lncRNA	u	chr13	109219110	109269570	-	N	ES	0.0470809	1.47277	4.96725	5e-05	0.00807114	UP
MSTRG.9732.1	-	-	-	novel_lncRNA	u	chr14	46702299	46726618	-	N	ES	2.81059	0.455679	-2.62478	5e-05	0.00807114	DOWN
MSTRG.9747.1	-	-	-	novel_lncRNA	u	chr14	48977396	49034748	-	N	ES	0.0023667	0.791853	8.38621	5e-05	0.00807114	UP
MSTRG.988.1	-	-	-	novel_lncRNA	u	chr1	34371730	34413687	-	N	ES	0.0518877	1.04112	4.32659	5e-05	0.00807114	UP
MSTRG.989.1	-	-	-	novel_lncRNA	u	chr1	34507816	34539923	-	N	ES	0.386097	1.26069	1.70718	5e-05	0.00807114	UP
